# Supplementary material
Source: Springer Nature journal article supplement (https://www.springermedizin.de/resource/supplementary/12943_2012_1031_MOESM7_ESM.pdf/9552130)

PHA-739358  
(45 mg/kg 2 h)

Spleen

Bone marrow

- + +

- + +

250

130

95

72

55

36

pTyr

←  
Bcr/Abl  
P210

Bcr

p-Histone H3

Histone H3

p-CrkL

CrkL

Gapdh

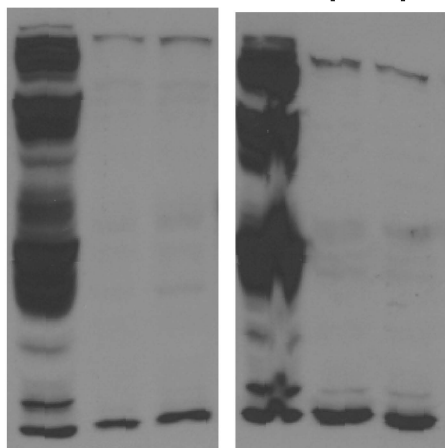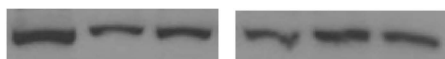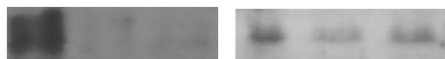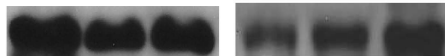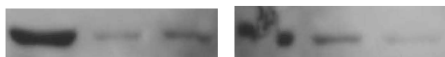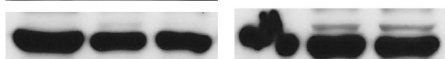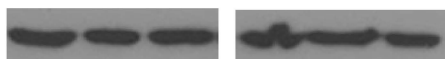

Supplement: MOESM7 [file 9552130]
